# Supplementary material for: Preparation of MoS2@AuNP nanocomposite by a self-reduction method and its application for electrochemical glucose sensing
Source: Royal Society of Chemistry journal article supplement (doi:10.1039/d2ma00819j), 2022-01-01
Supplement: d2ma00819j1.pdf [file d2ma00819j1.pdf]

## Supporting Information

### Preparation of MoS<sub>2</sub>@AuNPs nanocomposite by a self-reduction method and its application for electrochemical glucose sensing

Jiameng Wang,<sup>a</sup> Wuyi Zhang,<sup>a</sup> Lanlan Chen,<sup>a</sup> Jie Huang,<sup>a</sup> Xiaojia Shi,<sup>a</sup> Dong Han,<sup>a</sup> Jia Wen<sup>a,\*</sup> and Hongyuan Yan<sup>a,\*</sup>

<sup>a</sup>Key Laboratory of Pharmaceutical Quality Control of Hebei Province, College of Pharmaceutical Science, Institute of Life Science and Green Development, Hebei University, Baoding 071002, China.

E-mail: wenjiahbu@163.com (J Wen); yanhy@hbu.edu.cn (H Yan)

### Table of Contents

|                |   |
|----------------|---|
| Figure S1..... | 1 |
| Figure S2..... | 1 |
| Figure S3..... | 2 |
| Figure S4..... | 2 |
| Figure S5..... | 3 |
| Figure S6..... | 3 |
| Figure S7..... | 4 |

**Figure S1**

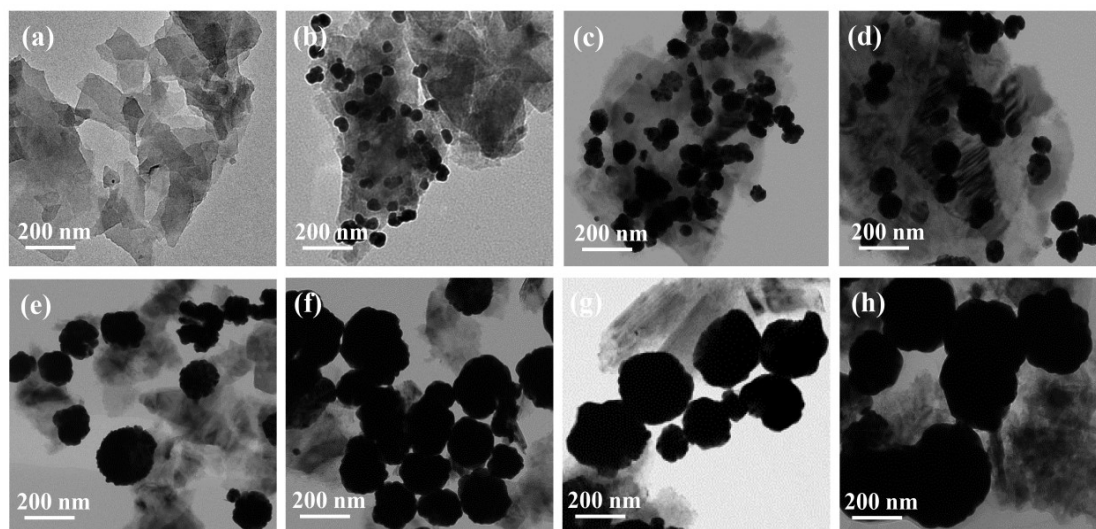

**Figure S1.** TEM images of (a) MoS<sub>2</sub> nanosheets and (b-h) MoS<sub>2</sub>@AuNPs nanocomposites (the concentration of HAuCl<sub>4</sub> was 1 mM, 5 mM, 7.5 mM, 10 mM, 15 mM and 20 mM in sequence).

**Figure S2**

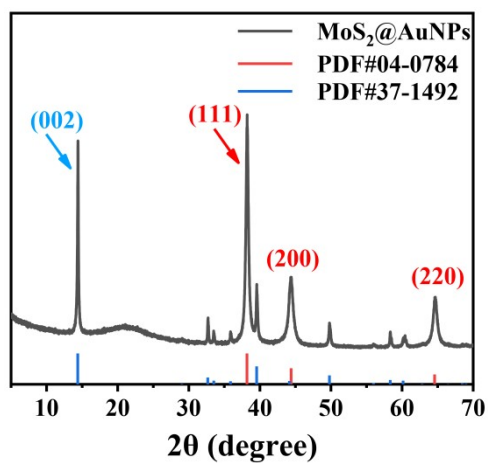

**Figure S2.** PXRD spectra of MoS<sub>2</sub>@AuNPs.

**Figure S3**

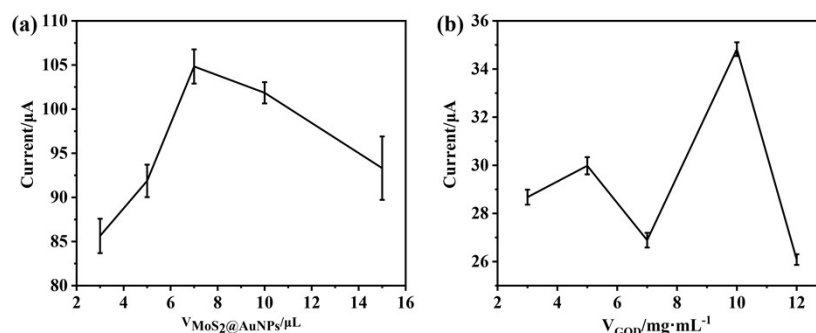

**Figure S3.** The effects of (a) the coating amounts of  $\text{MoS}_2@\text{AuNPs}$  nanocomposites and (b) the concentration of GOD on the performance of glucose sensor.

**Figure S4**

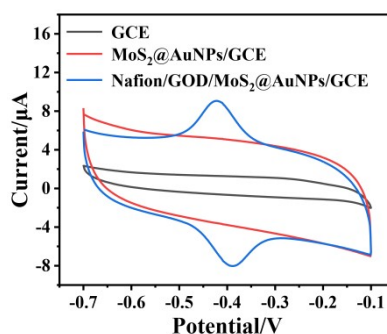

**Figure S4.** CVs of GCE,  $\text{MoS}_2@\text{AuNPs}/\text{GCE}$ ,  $\text{Nafion}/\text{GOD}/\text{MoS}_2@\text{AuNPs}/\text{GCE}$  in  $\text{N}_2$ -saturated 0.1 M pH 5.5 PBS at scan rate of 50 mV/s.

**Figure S5**

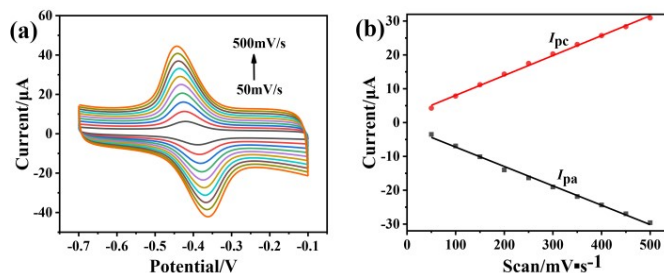

**Figure 9.** (a) CVs of the  $\text{Nafion}/\text{GOD}/\text{MoS}_2@\text{AuNPs}/\text{GCE}$  in  $\text{N}_2$ -saturated 0.1 M pH 5.5 PBS at 50, 100, 150, 200, 250, 300, 350, 400, 450, 500 mV/s (from inner to outer), respectively; (b) plots of anodic and cathodic peak currents vs. scan rates.

**Figure S6**

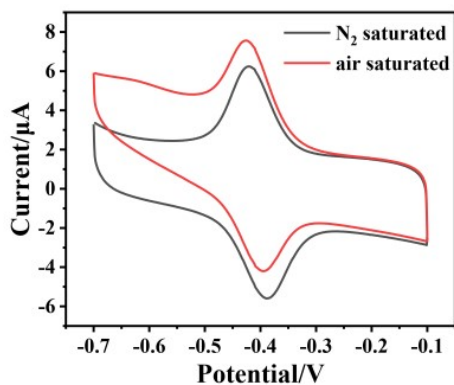

**Figure S6.** CVs of Nafion/GOD/MoS<sub>2</sub>@AuNPs/GCE in N<sub>2</sub>-saturated (black line) and air-saturated (red line) 0.1 M pH 5.5 PBS at 50 mV/s.

**Figure S7**

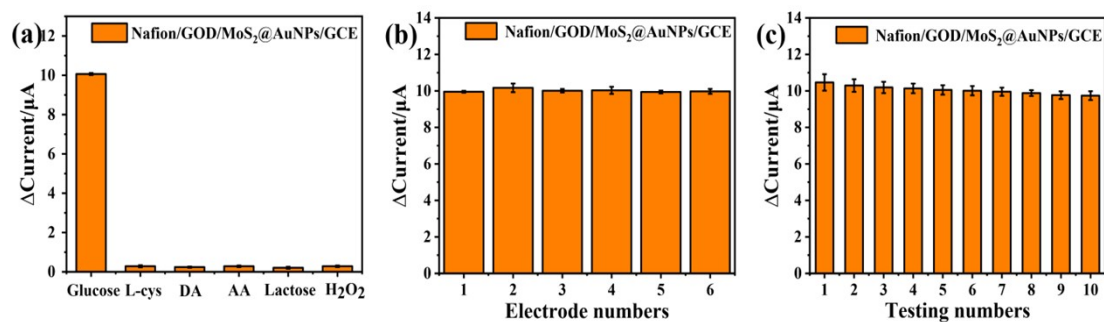

**Figure S7.** (a) Specificity (b) repeatability and (c) reproducibility of Nafion/GOD/MoS<sub>2</sub>@AuNPs/GCE.
